# Supplementary material for: Ion transport across bilayer lipid membranes between two aqueous phases in the presence of iodide and triiodide ions
Source: Royal Society of Chemistry journal article supplement (doi:10.1039/d5cp02791h), 2025-12-17
Supplement: d5cp02791h1.pdf [file d5cp02791h1.pdf]

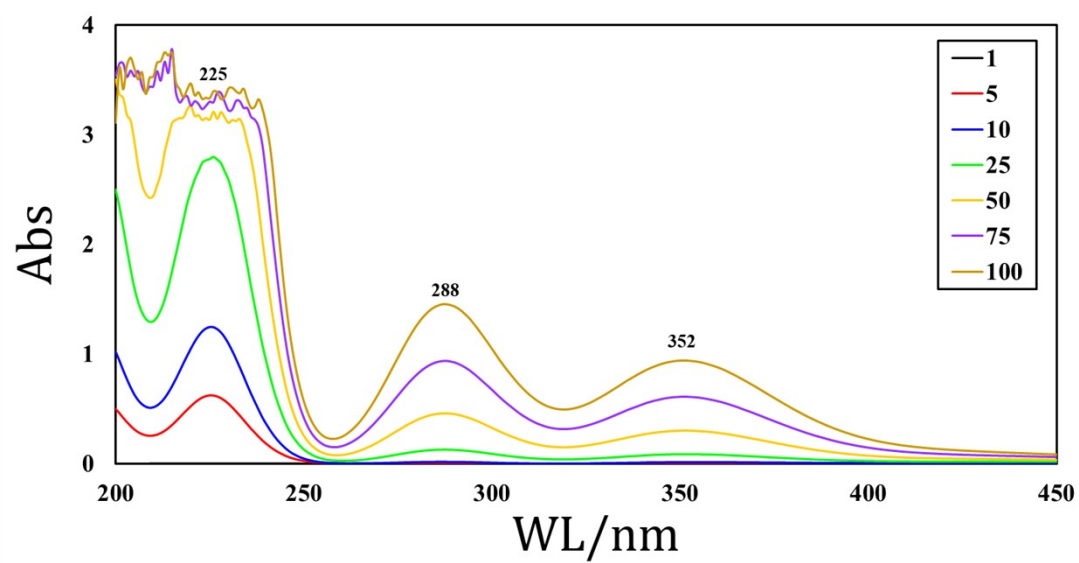

Figure SI. Spectrophotography of 0.1 M KI aqueous solution in the presence of 1, 5, 10, 25, 50, 75, and 100  $\mu M$   $I_3^-$ .

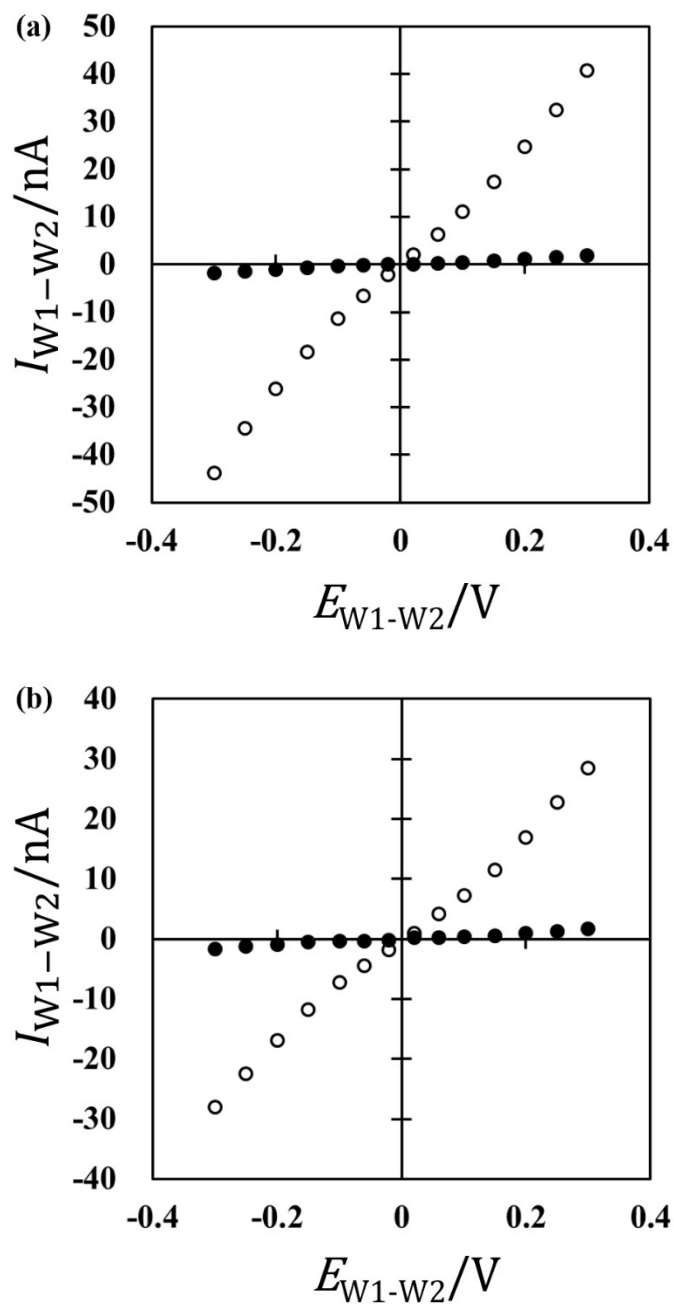

Figure SI2. NPV voltammogram for the ion transfer across the BLMs in the TM between W1 and W2 containing (a) 0.1 M NaI aqueous solution and (b) 0.1 M CsI aqueous solution, in the absence of  $\text{I}_3^-$  (●) and in the presence of 50  $\mu\text{M}$   $\text{I}_3^-$  (○), respectively.

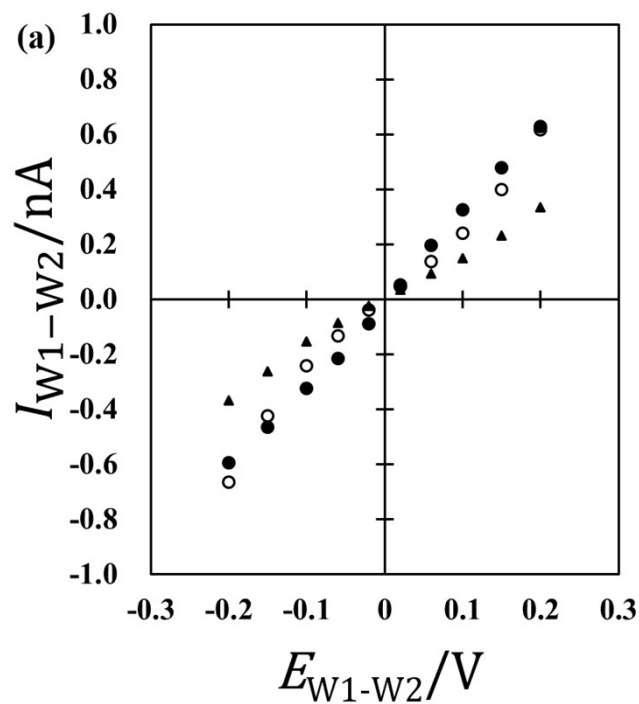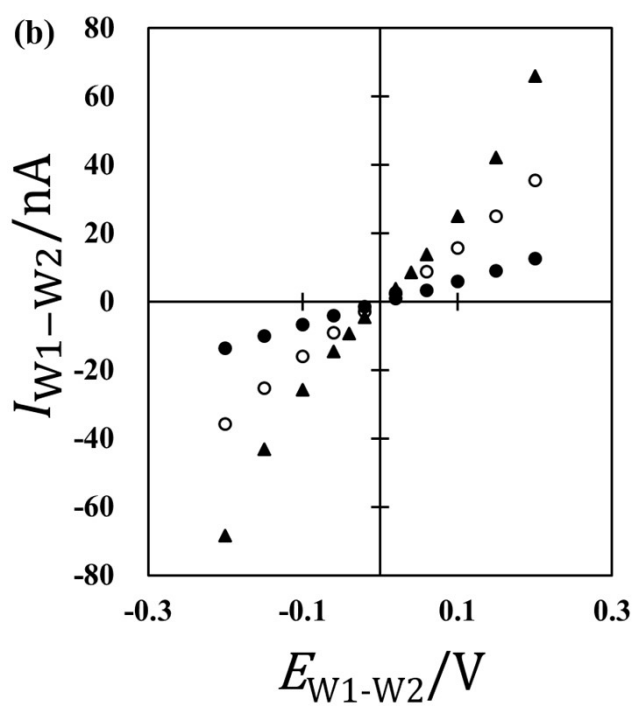

Figure S13. NPV voltammogram for the ion transfer across the BLMs in the TM between W1 and W2 containing 0.1 M KI aqueous solution in the absence of  $\text{I}_3^-$  (a) and in the presence of 50  $\mu\text{M}$   $\text{I}_3^-$  (b) at the temperature of 40 ( $\blacktriangle$ ), 25 ( $\circ$ ), 10 ( $\bullet$ ) °C, respectively.
